# Supplementary material for: Germline inherited small RNAs facilitate the clearance of untranslated maternal mRNAs in C. elegans embryos
Source: PubMed Central journal article supplement (PMC7933186; doi:10.1038/s41467-021-21691-6), 2021-03-04
Supplement: 41467_2021_21691_MOESM8_ESM.pdf [file 41467_2021_21691_MOESM8_ESM.pdf]

## Description of Additional Supplementary Files

**File:** Supplementary Data 1

**Description:** Gene lists generated and used in this study and associated TPM values.

**File:** Supplementary Data 2

**Description:** Strain lists generated and/or used in this study.

**File:** Supplementary Data 3

**Description:** CRISPR-Cas9 guide RNA lists used in this study.

**File:** Supplementary Data 4

**Description:** Primer lists used for RT-qPCR.

**File:** Supplementary Data 5

**Description:** Oligos used for smFISH.
